# Supplementary material for: Determination of Aflatoxin M1 in Raw Cow's Milk by Using HPLC-FLD, in Injibara Town, Awi Zone, Amhara, Ethiopia
Source: Preprints.org preprint supplement (doi:10.20944/preprints202010.0181.v1), 2020-10-08

Aflatoxin M1 in Milk sample Chromatogram

11185021 A


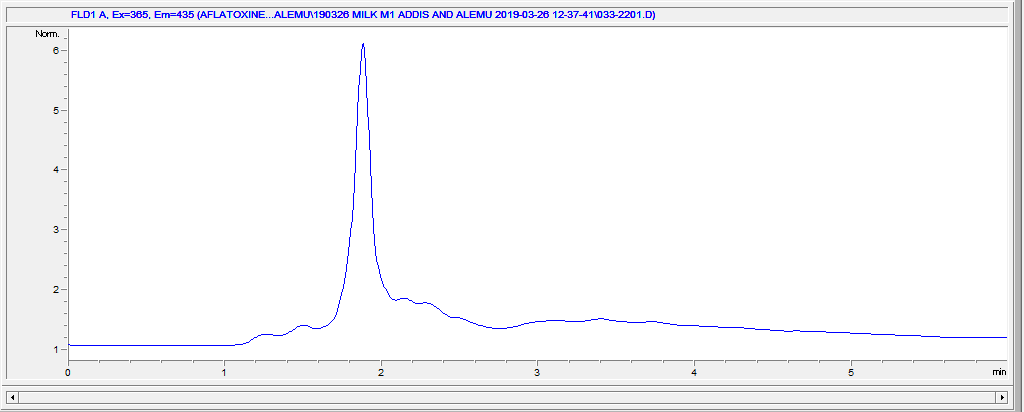


11185021 B


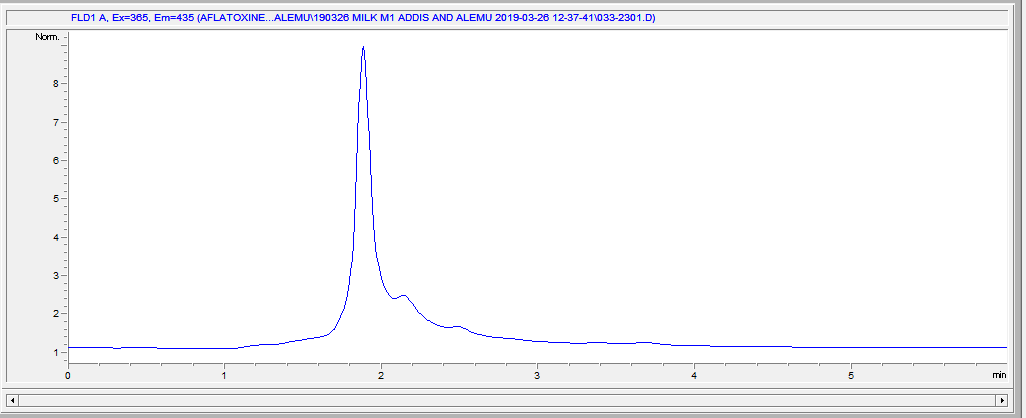


11185021 C


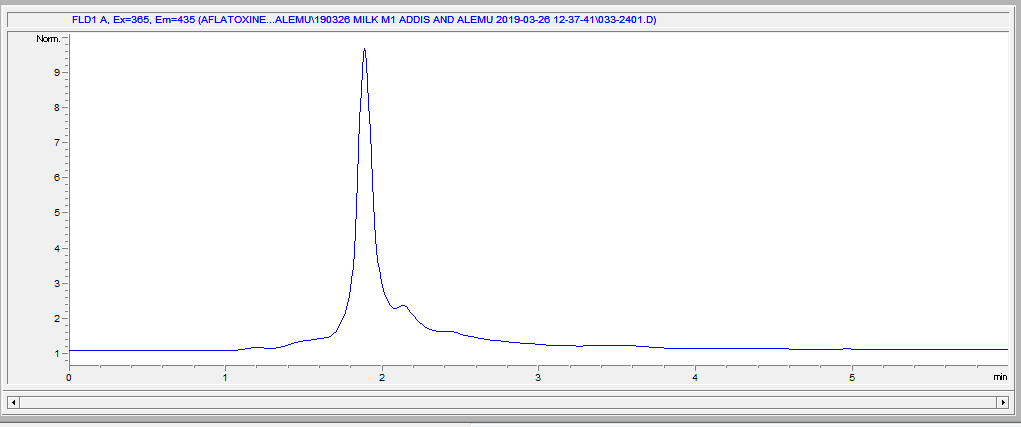


11185022 A


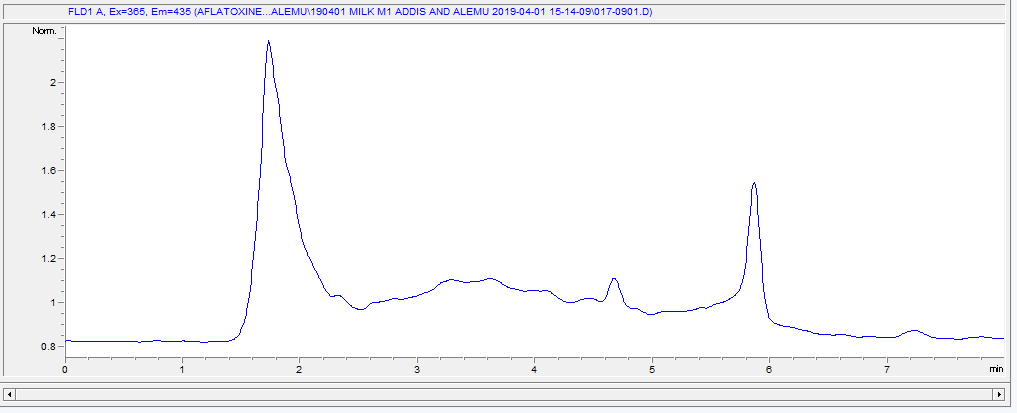


11185022 B


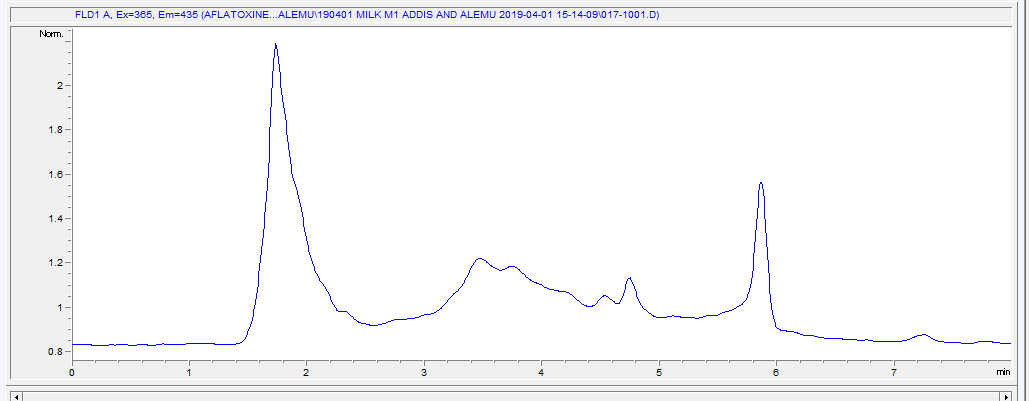


11185022 C


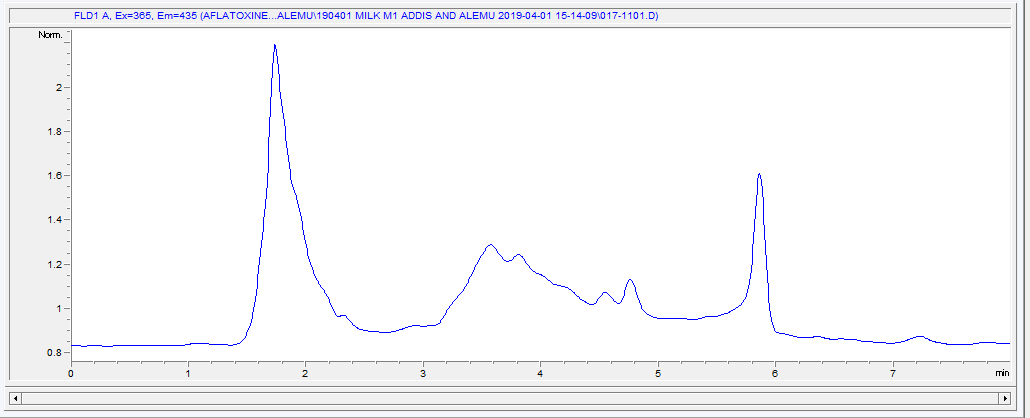


11185023 A


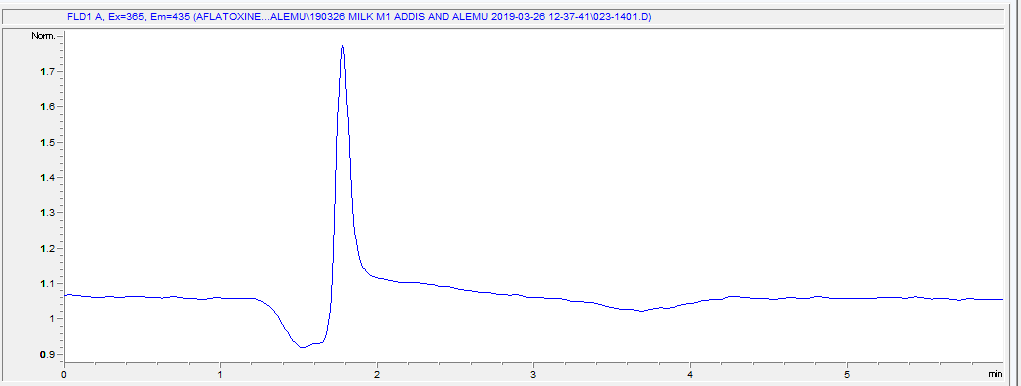


11185023 B


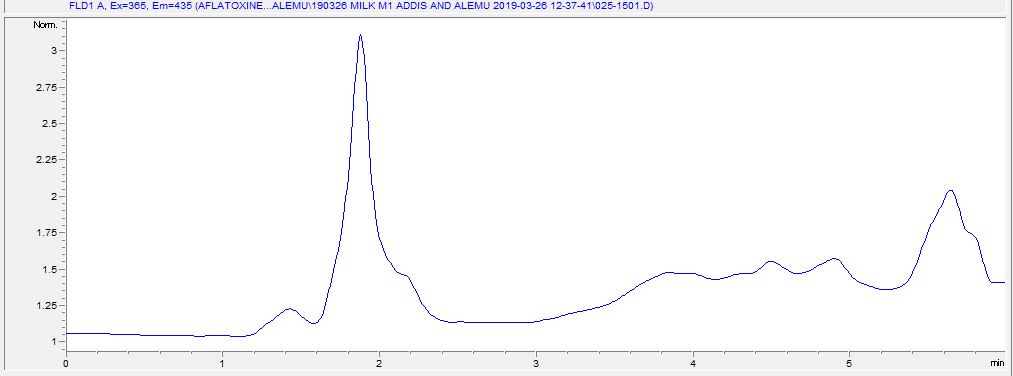


11185023 C


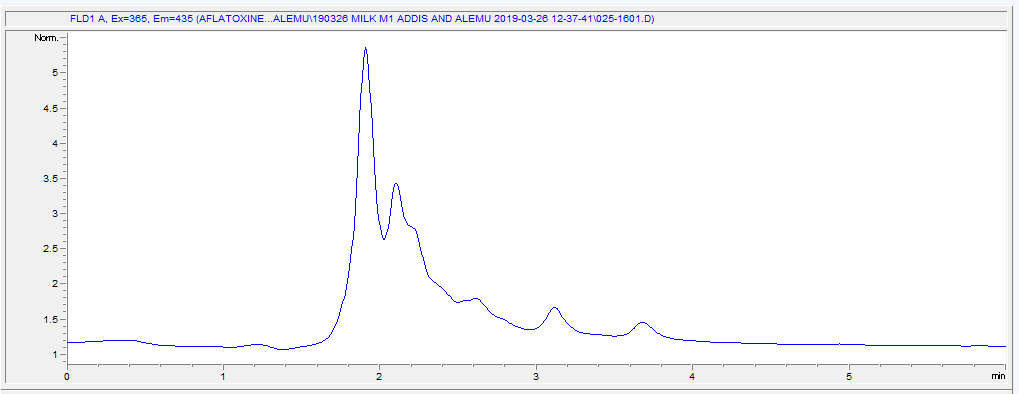


11185023 C overlaid with 0.5ppb M1 standard


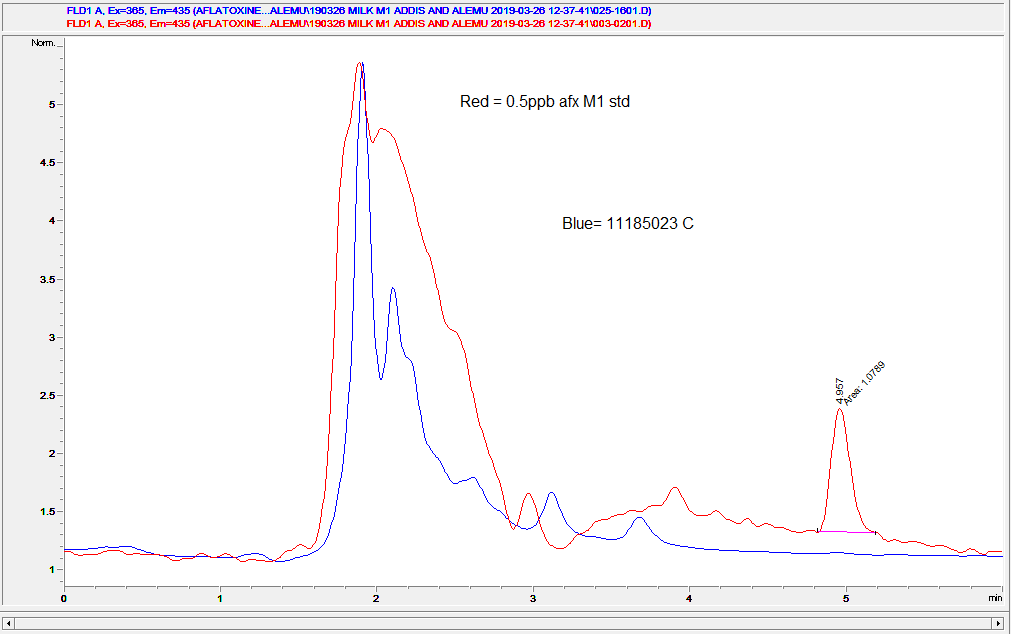


11185024 A


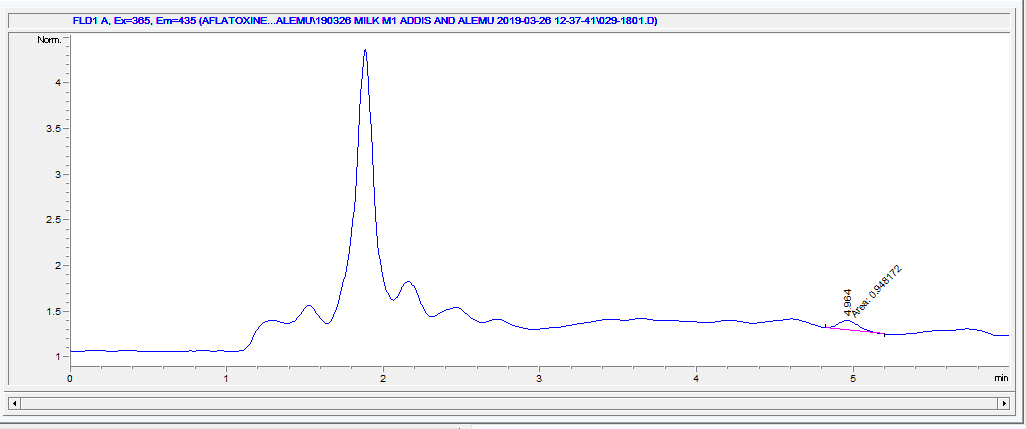


11185024 B


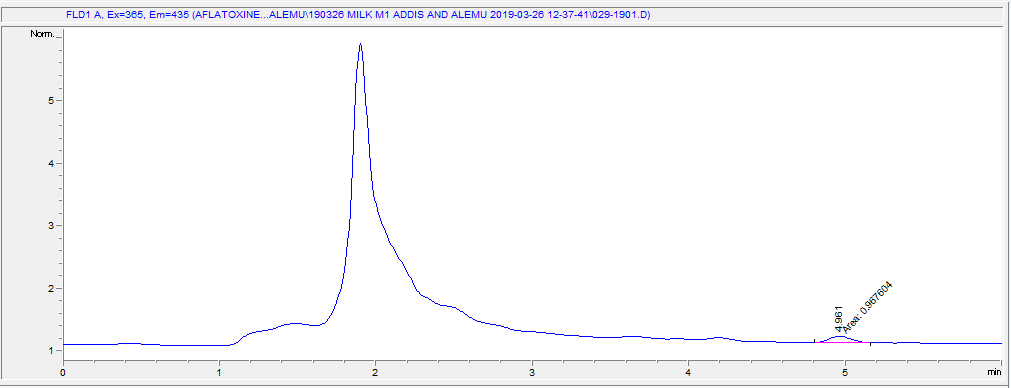


11185024 C


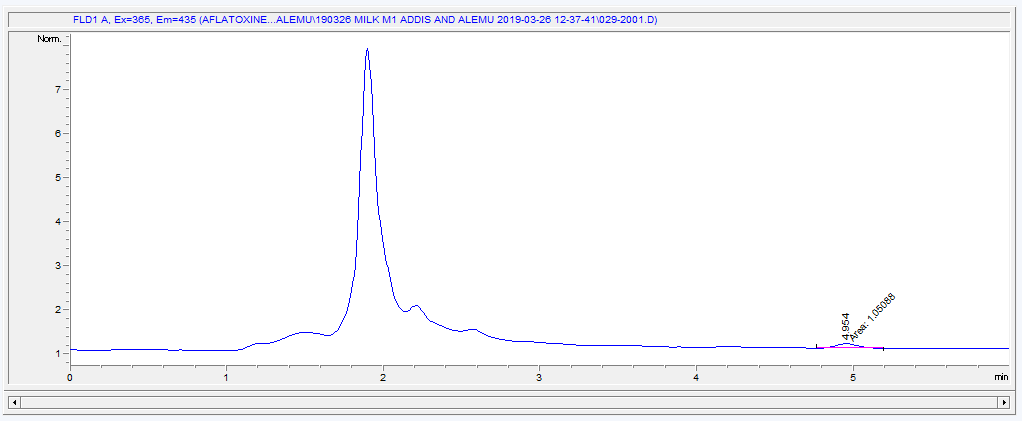


11185024 C overlaid with 0.5ppb M1 standard


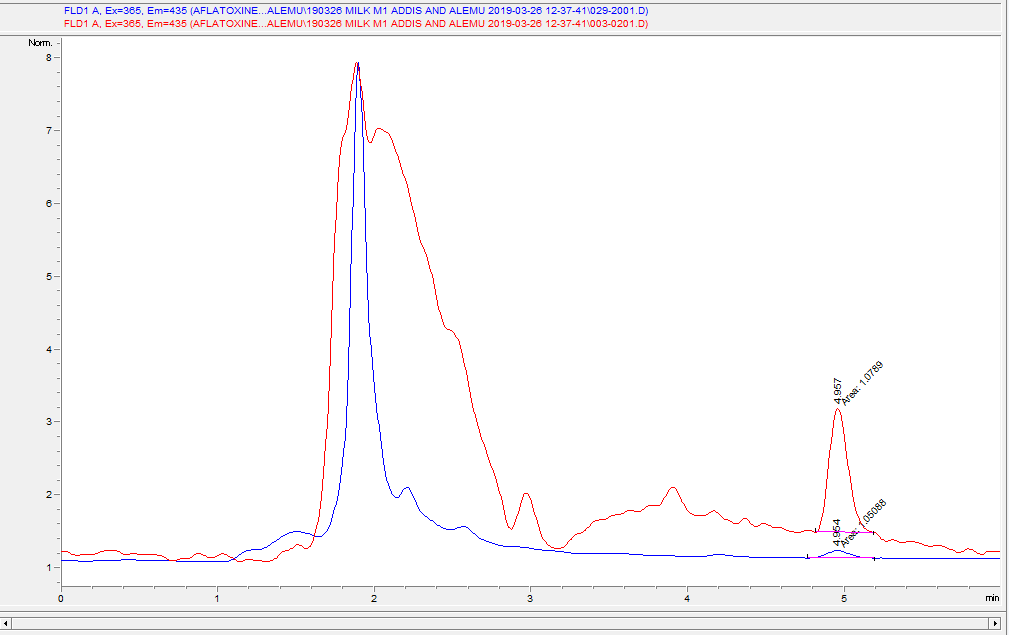


11185025 A


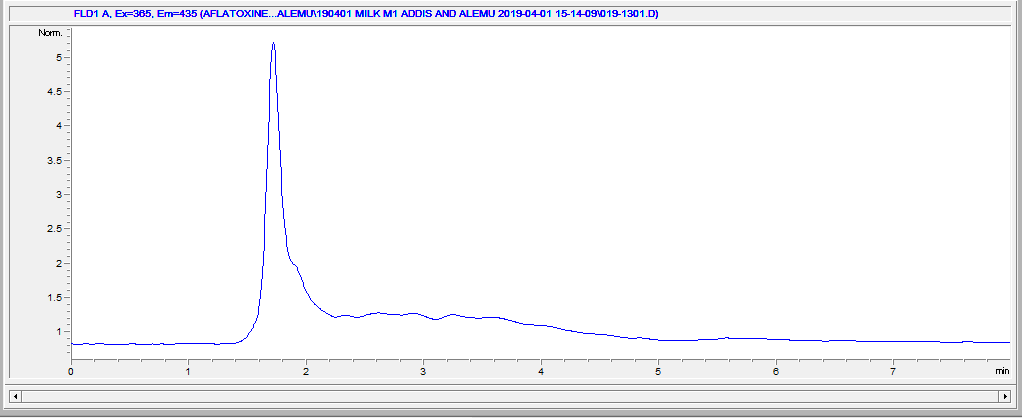


11185025 B


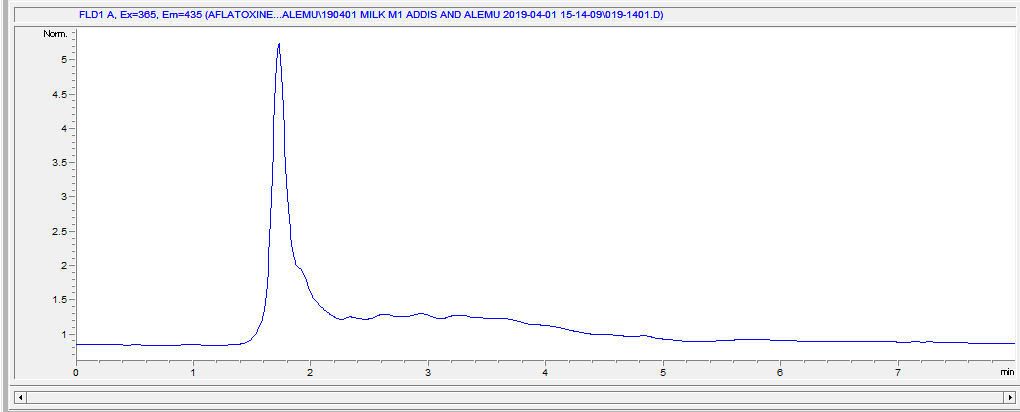


11185025 C


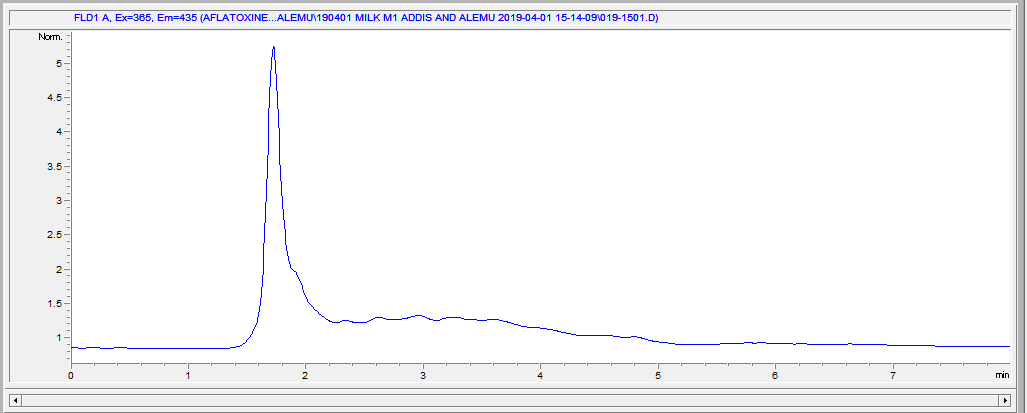


11185026 A


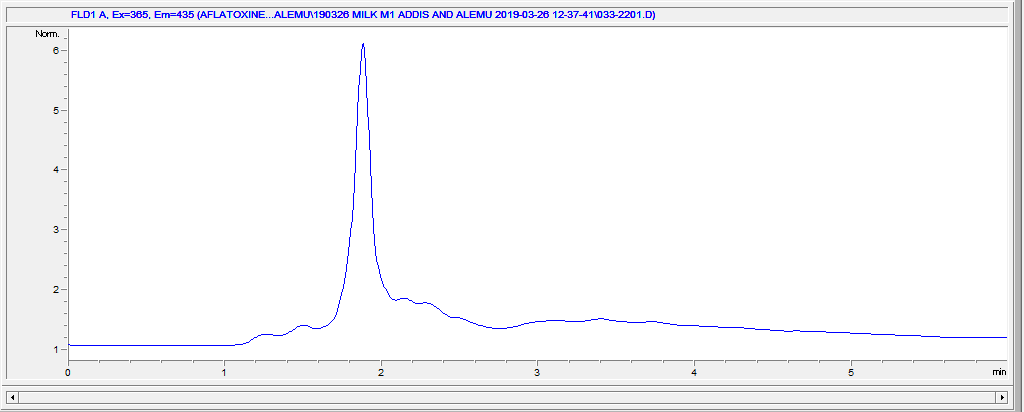


11185026 B


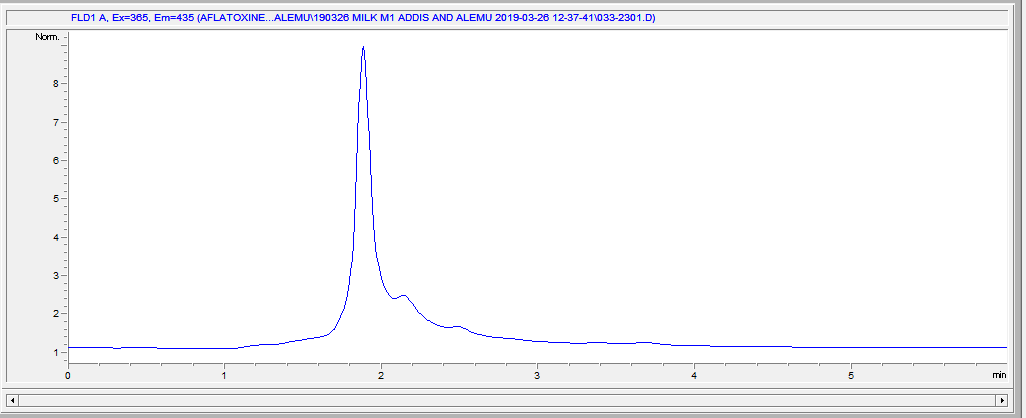


11185026 C


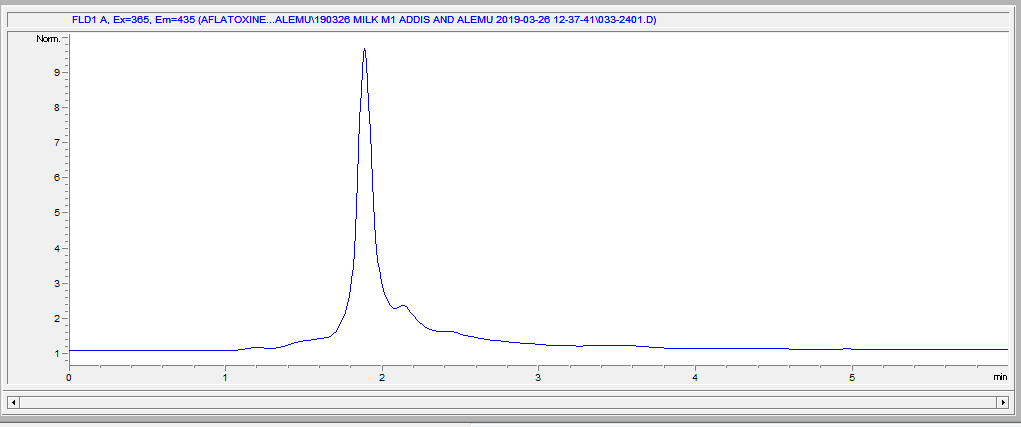


11185027 A


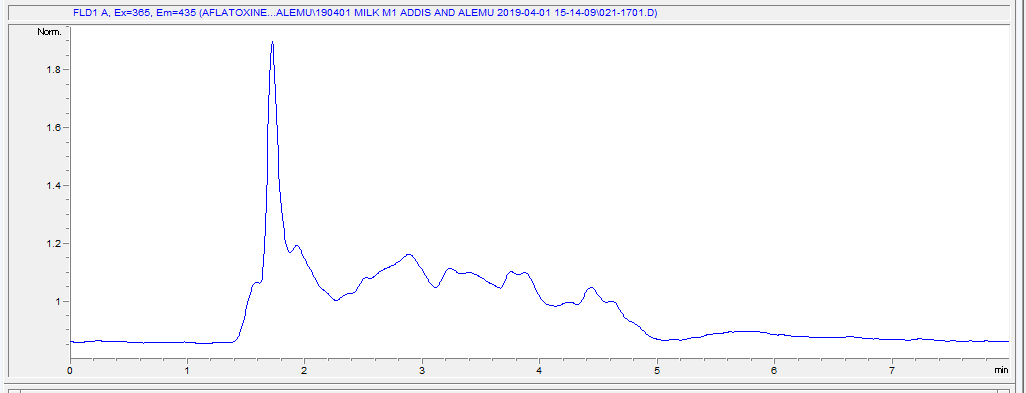


11185027 B


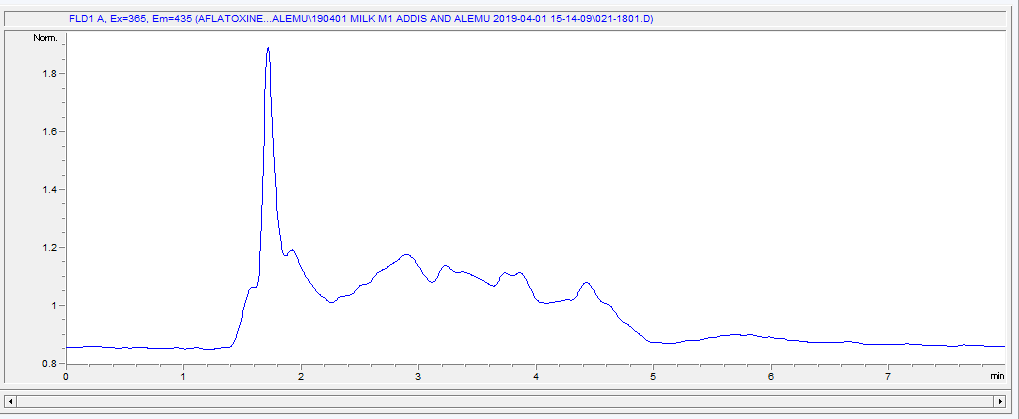


11185027 C


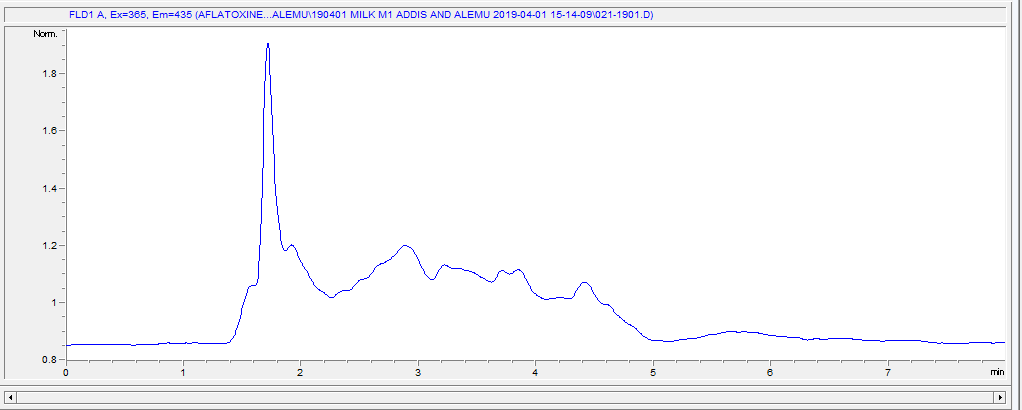


11185028 A


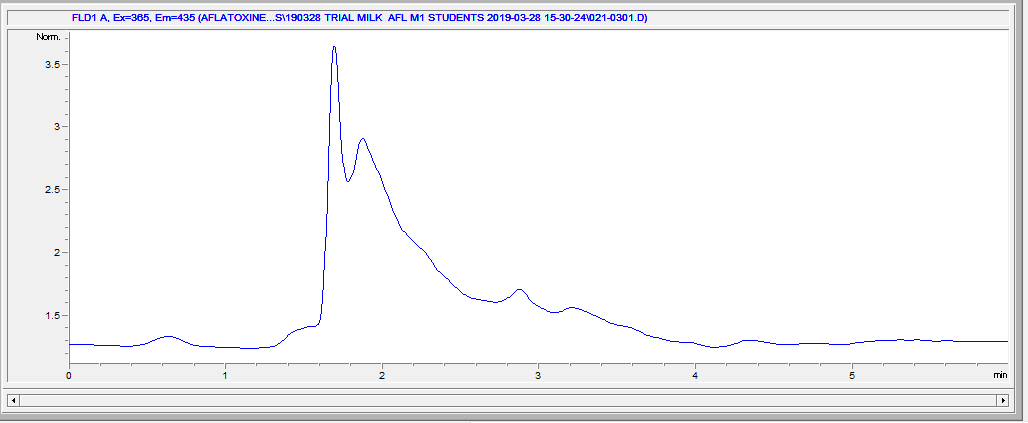


11185028 B


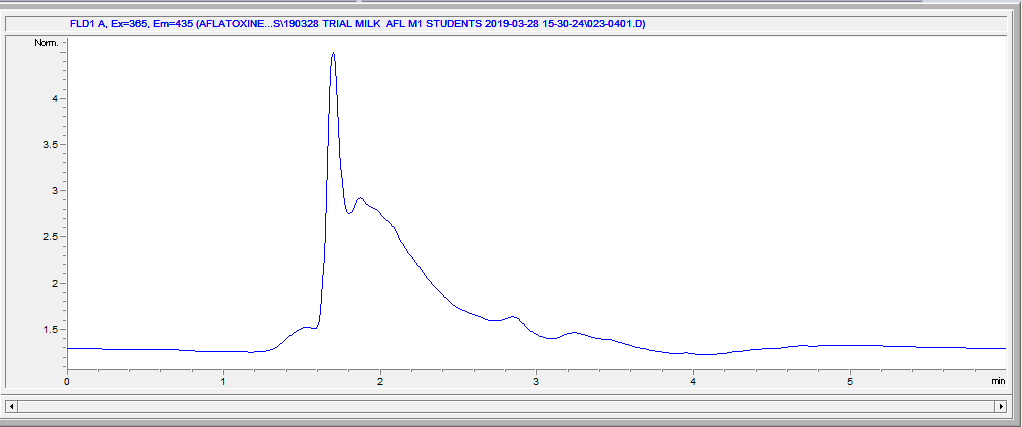


11185028 C


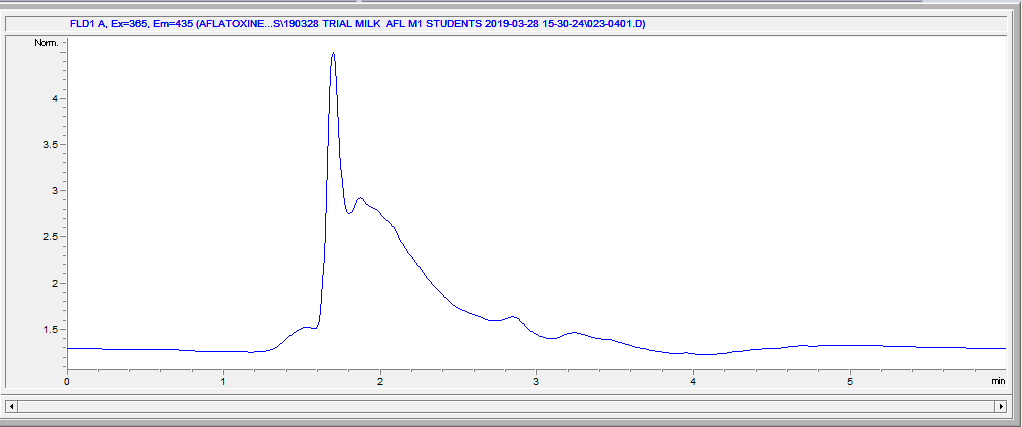


11185029 A


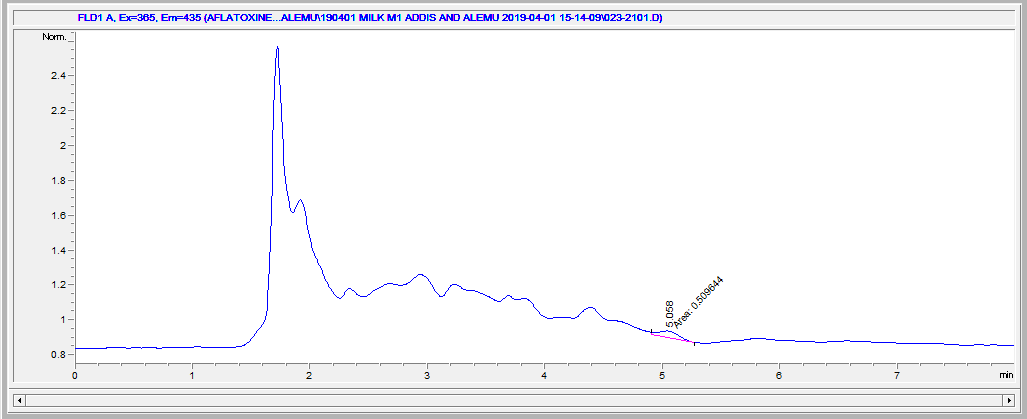


11185029 B


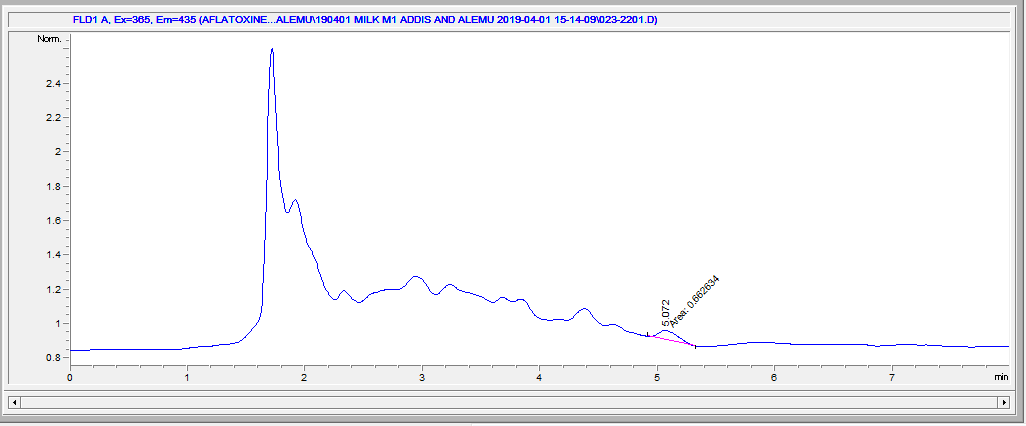


11185029 C


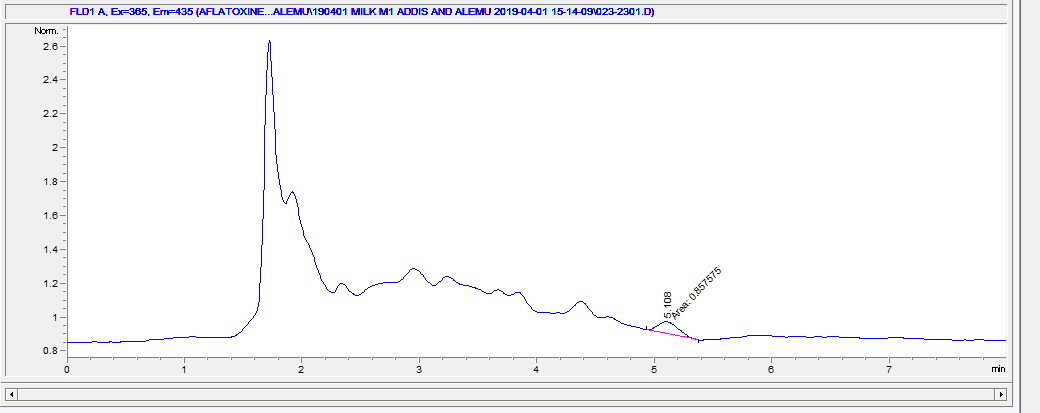


11185029 C overlaid with 0.5ppb M1 standard


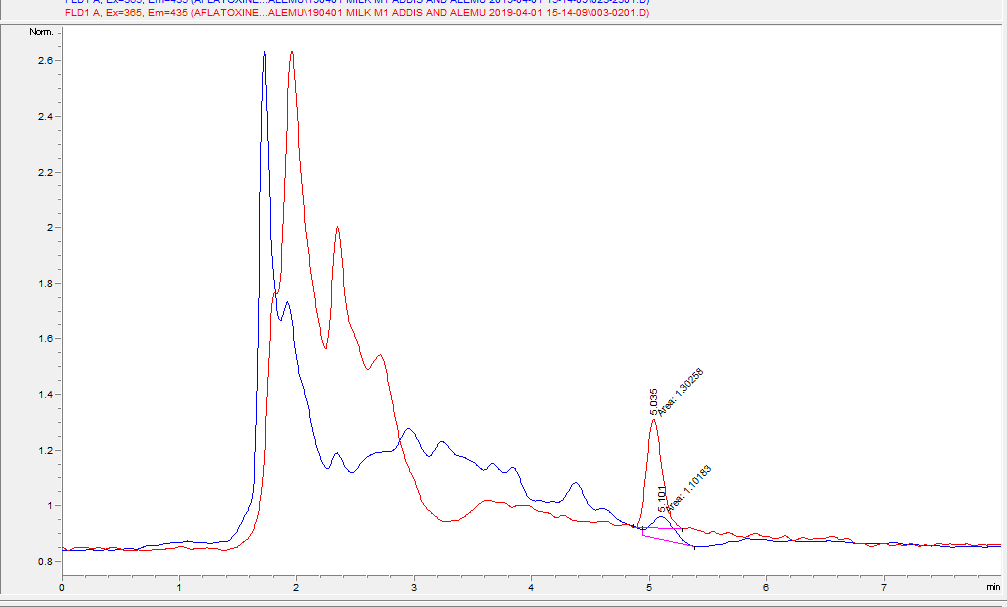


11185030 A


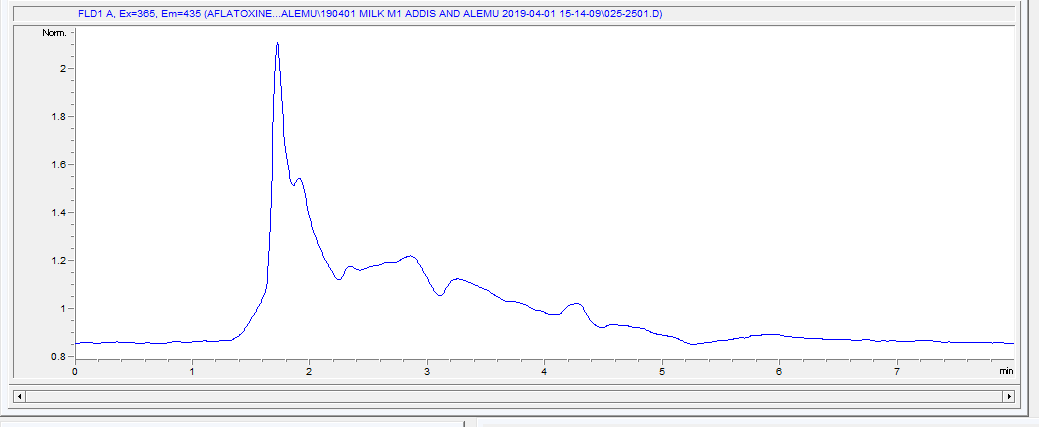


11185030 B


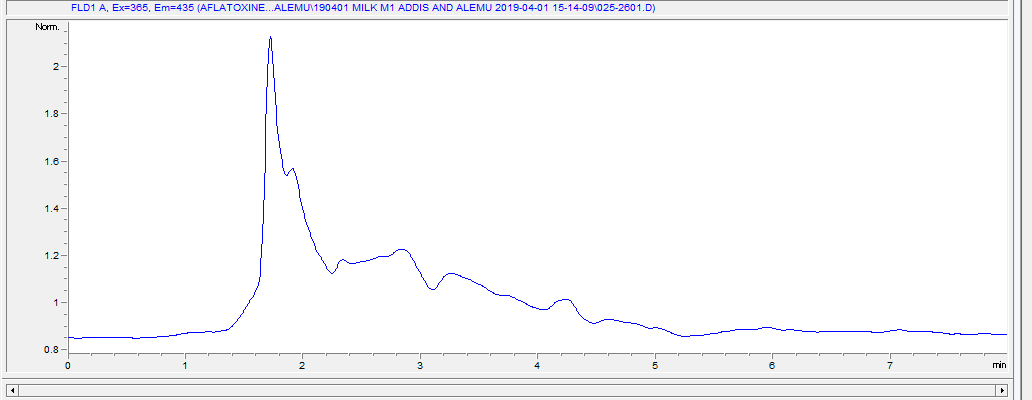


11185030 C


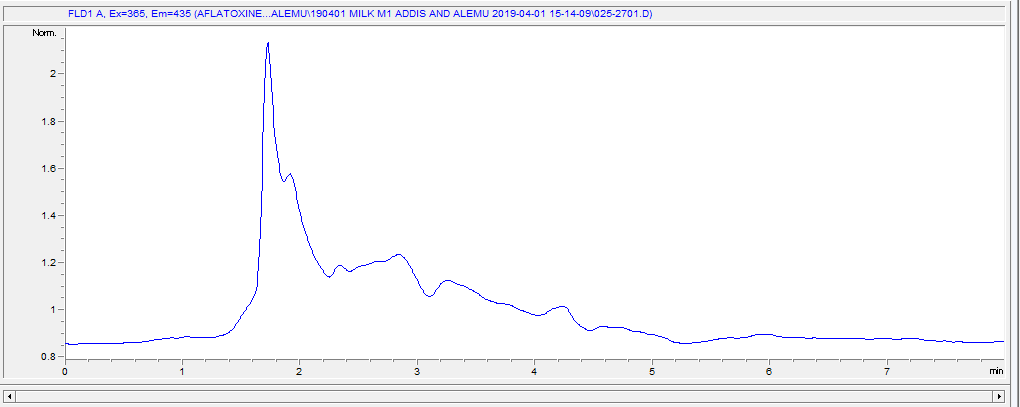


11185031 A


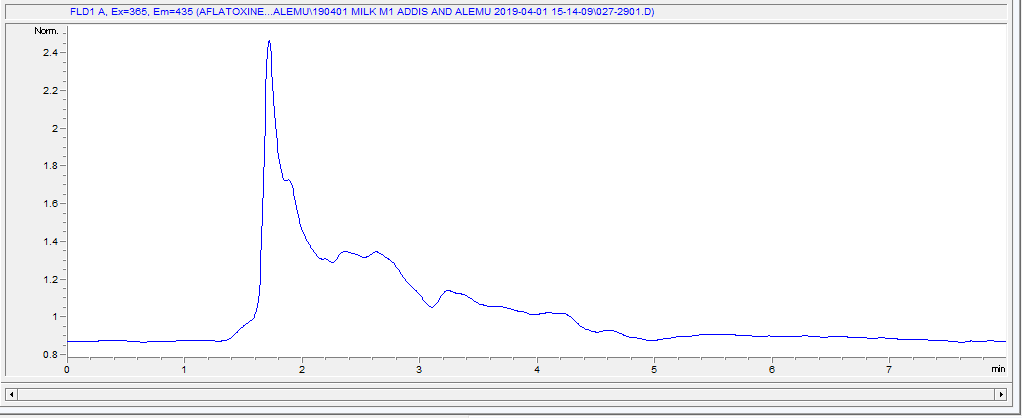


11185031 B


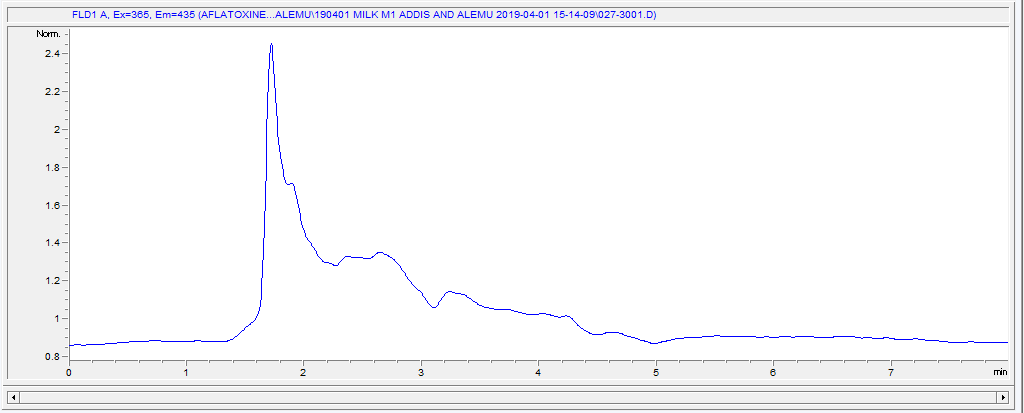


11185031 C


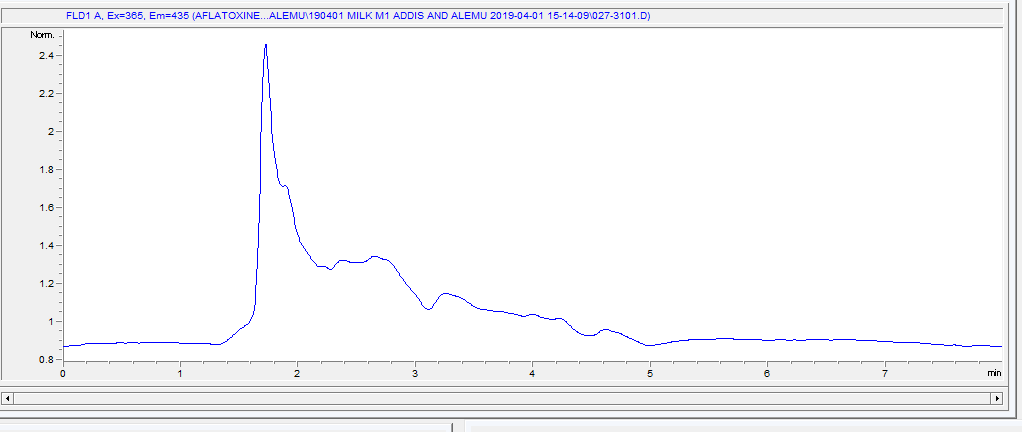


11185032 A


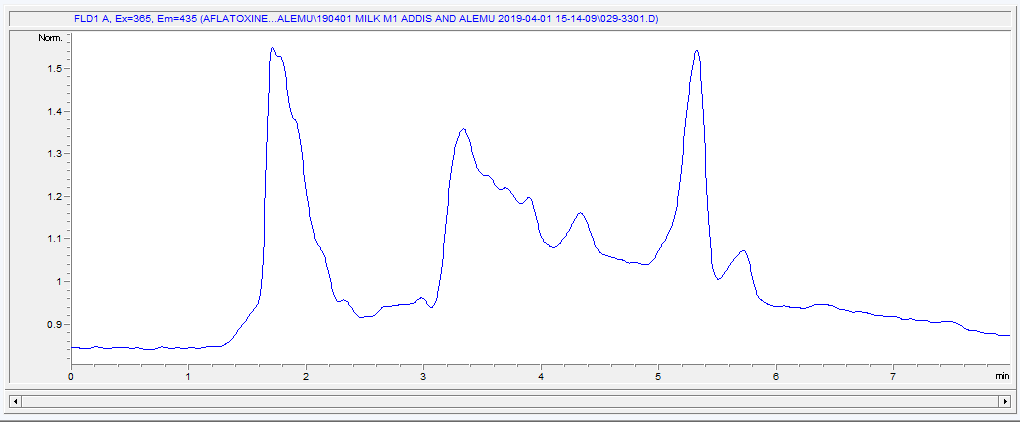


11185032 B


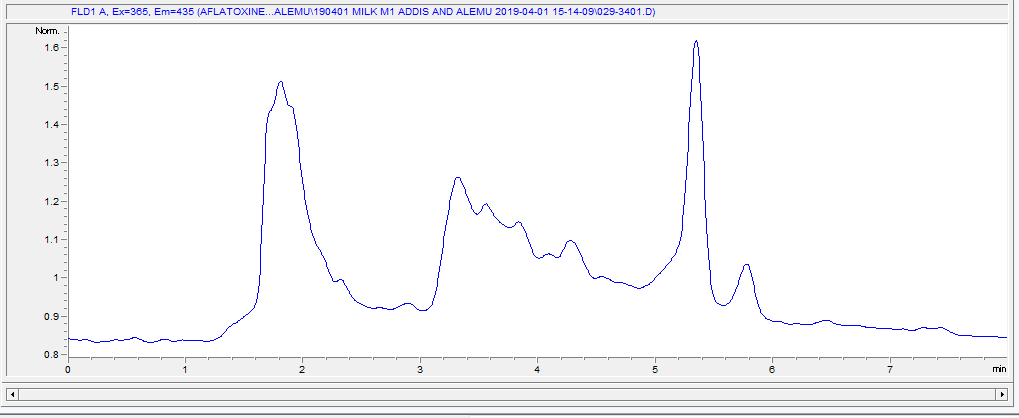


11185032 C


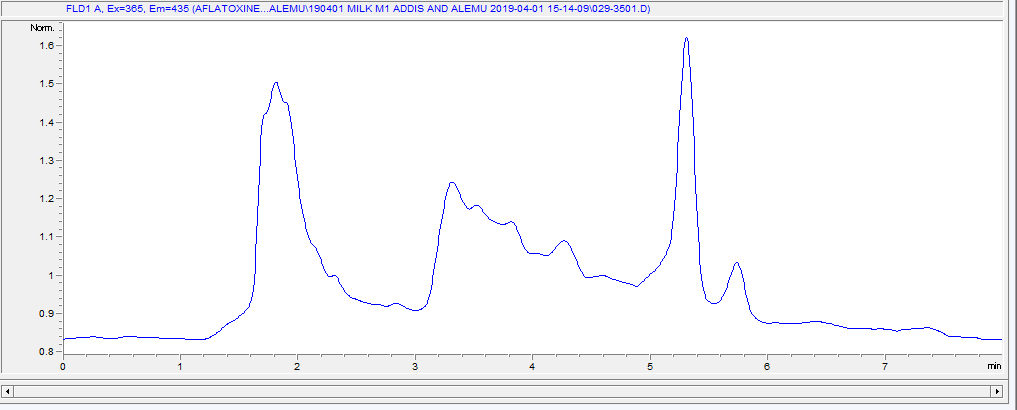


11185032 C overlaid with 0.5ppb M1 standard


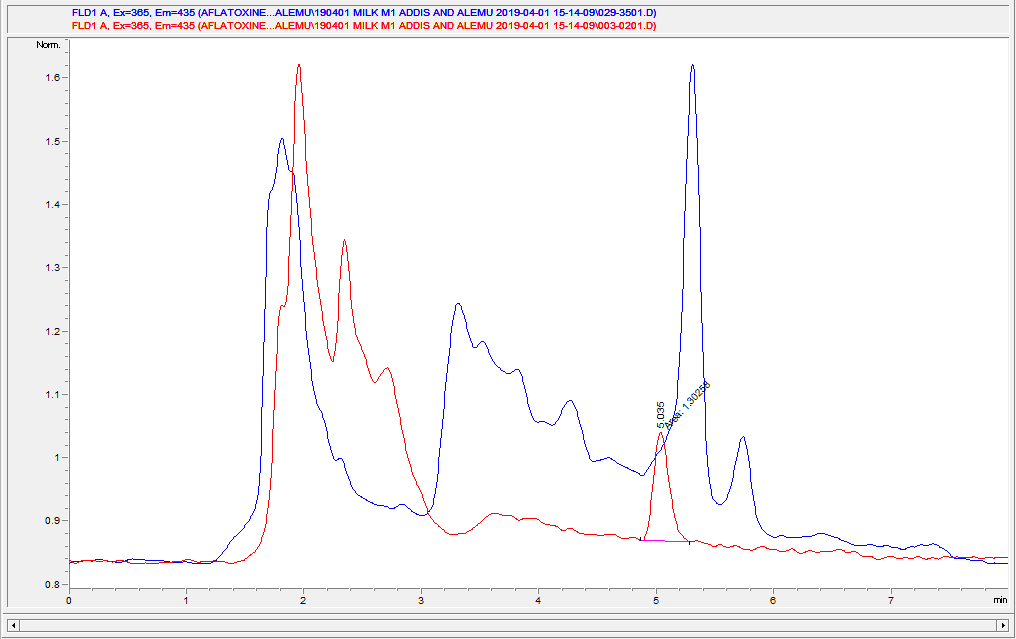


11185033 A


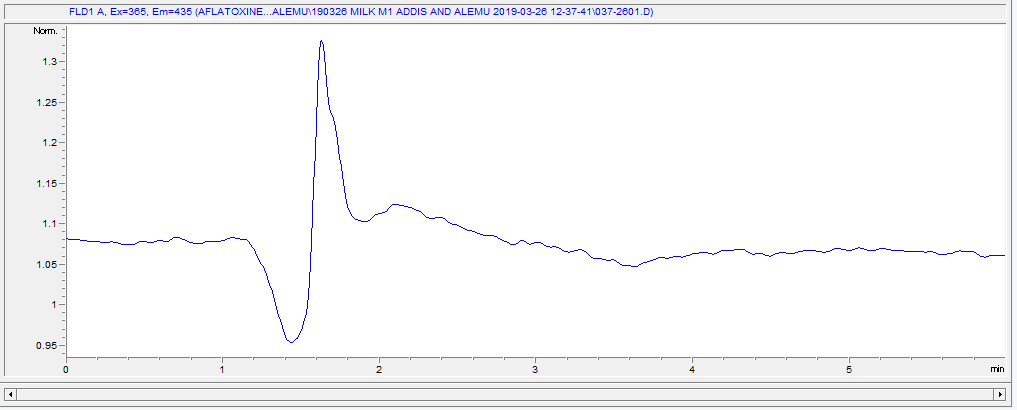


11185033 B


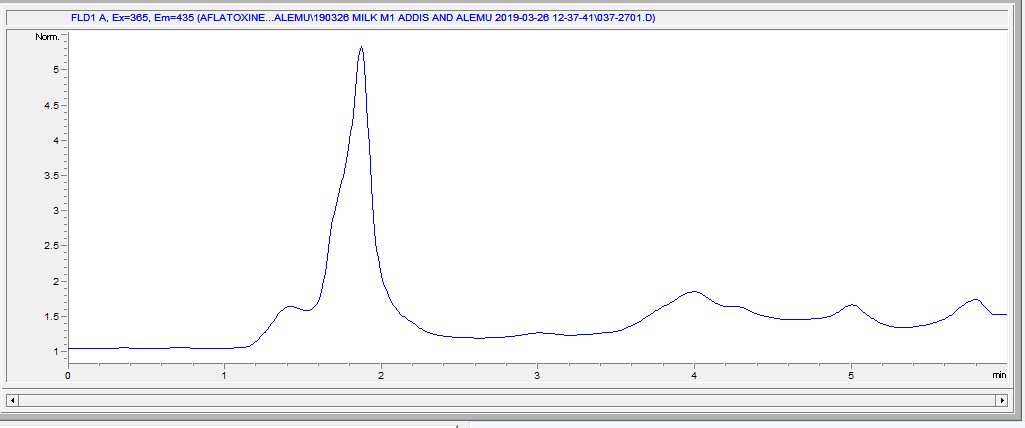


11185033 C


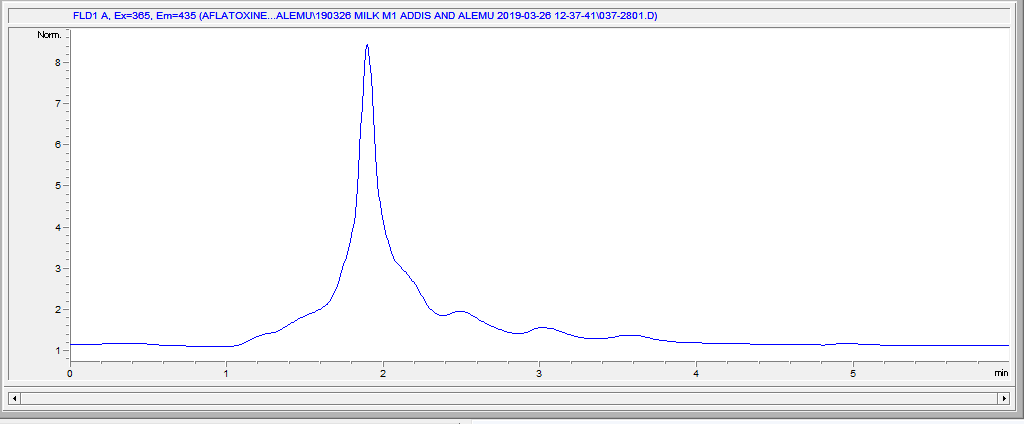


11185034 A


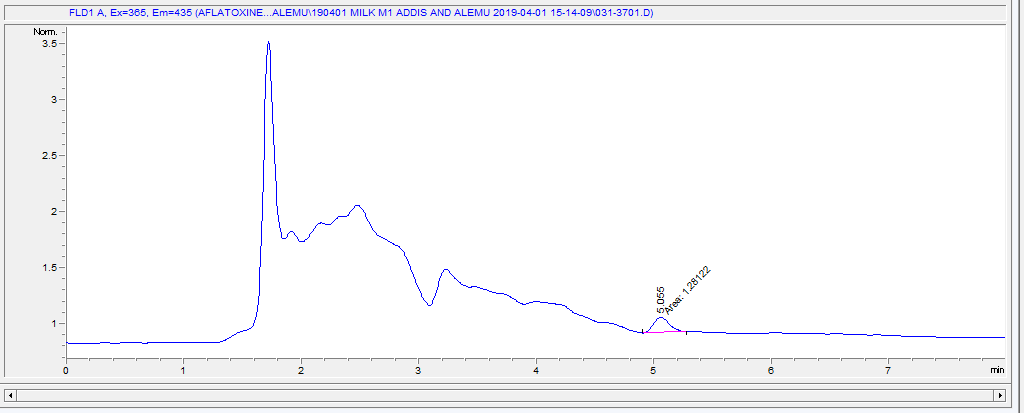


11185034 B


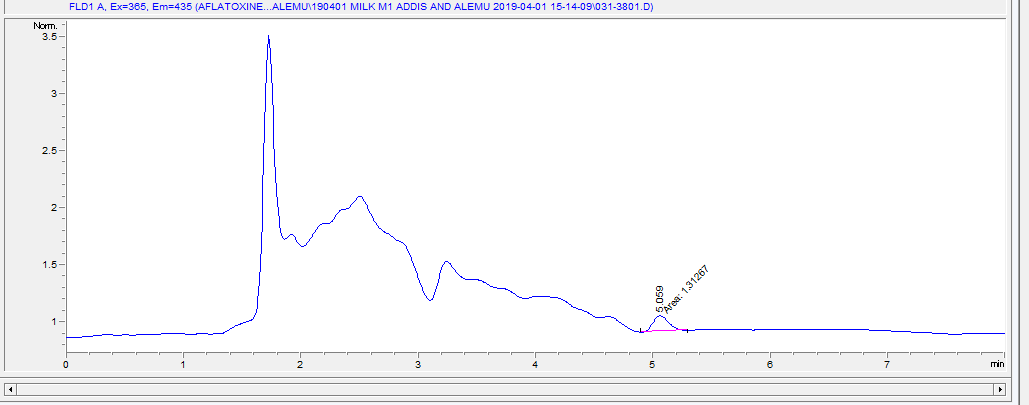


11185034 C


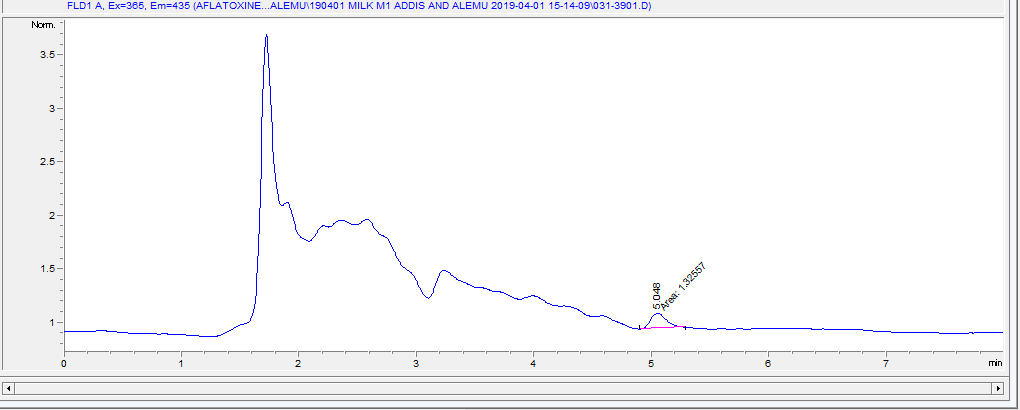


11185034 C overlaid with 0.5ppb M1 standard


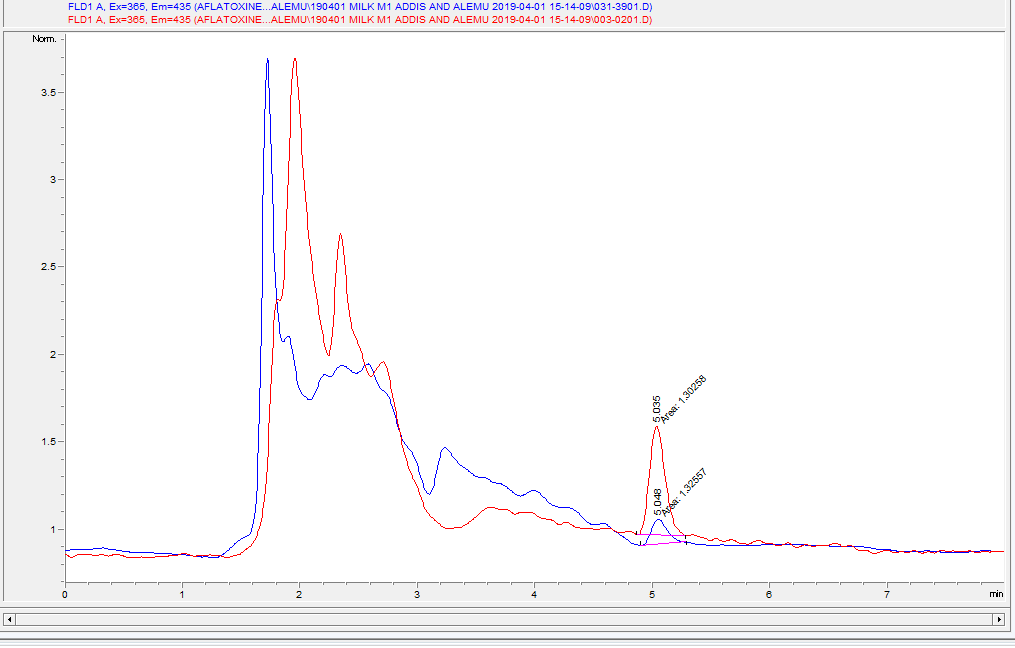


11185035 A


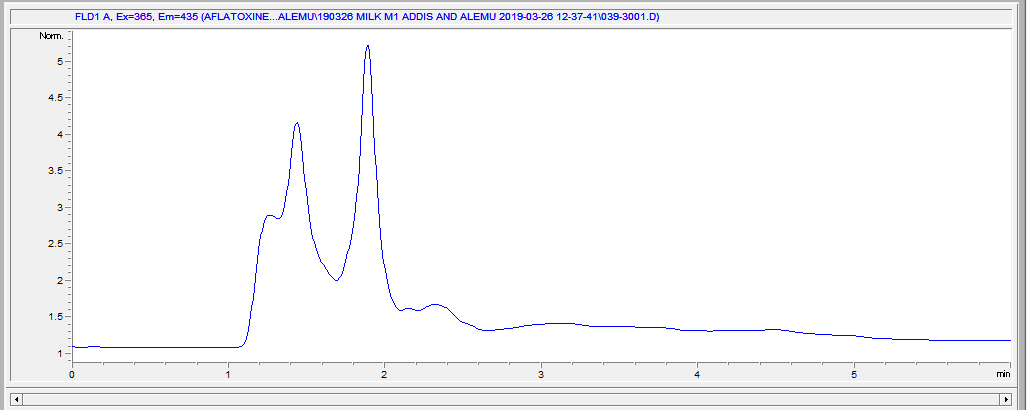


11185035 B


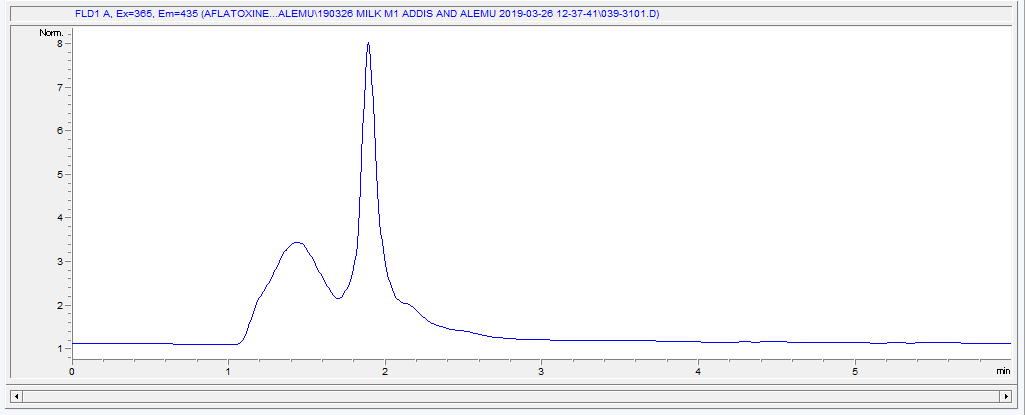


11185035 C


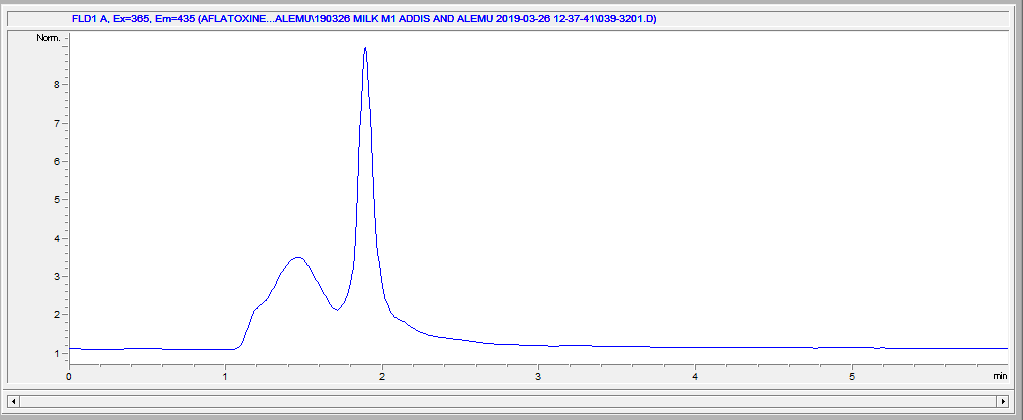


11185036 A


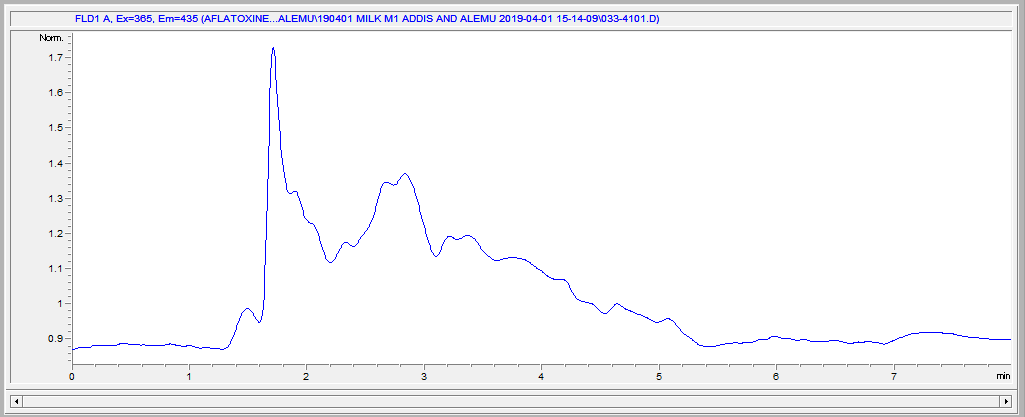


11185036 B


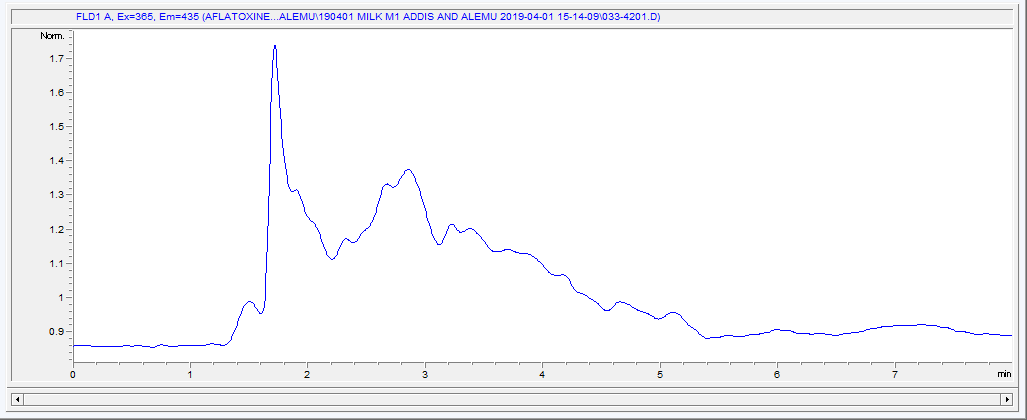


11185036 C


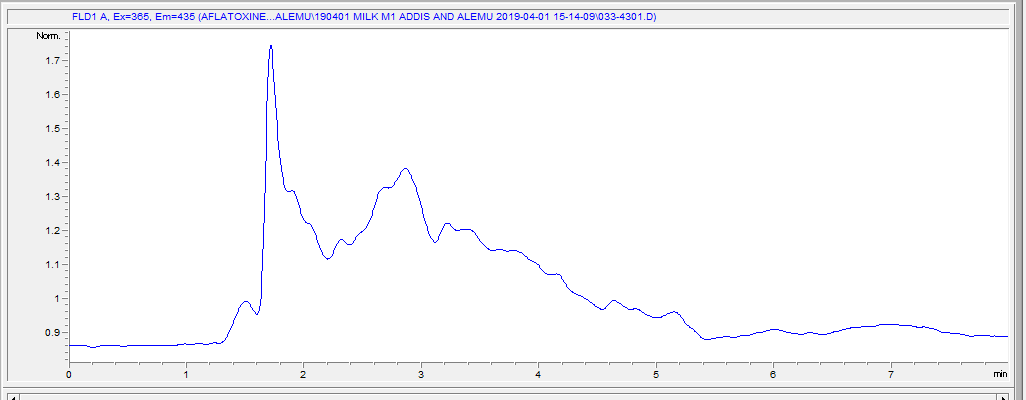


11185037 A


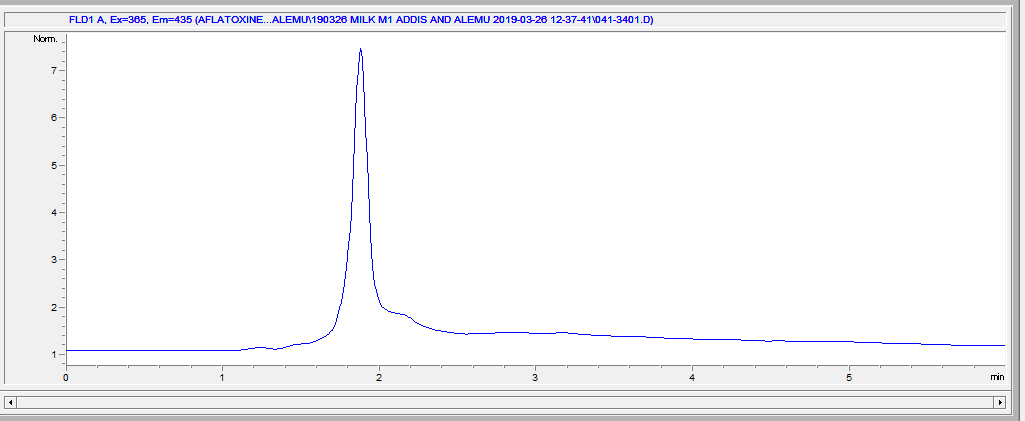


11185037 B


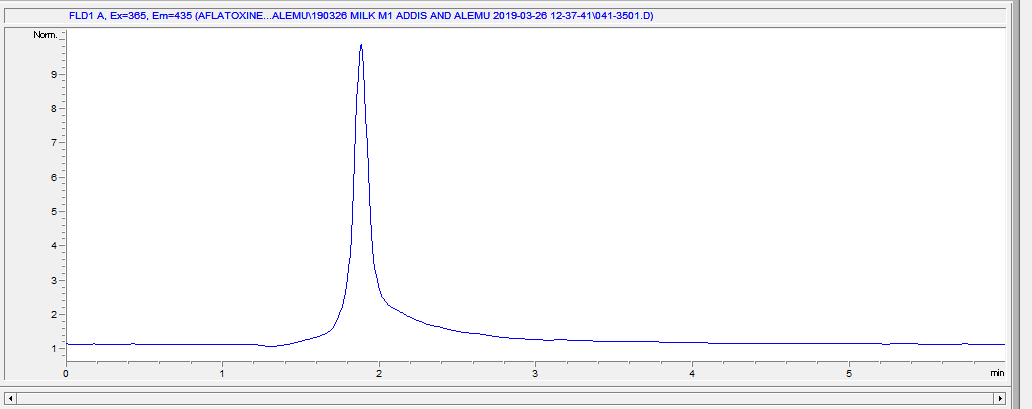


11185037 C


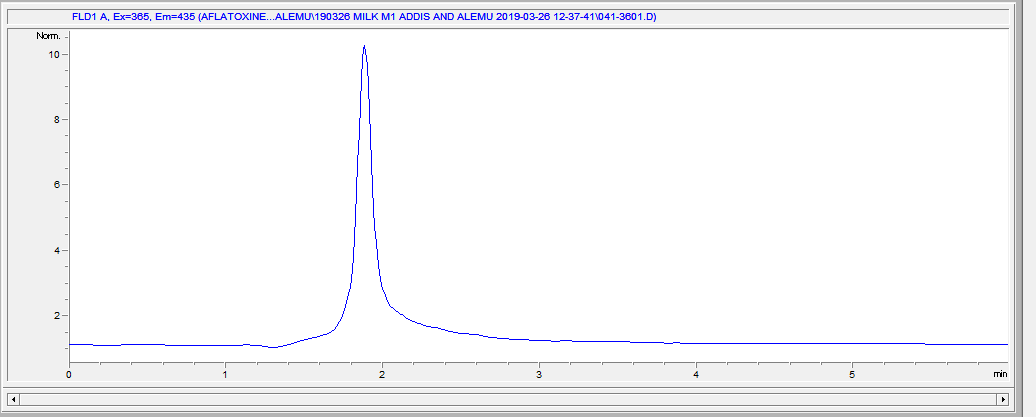


11185038 A


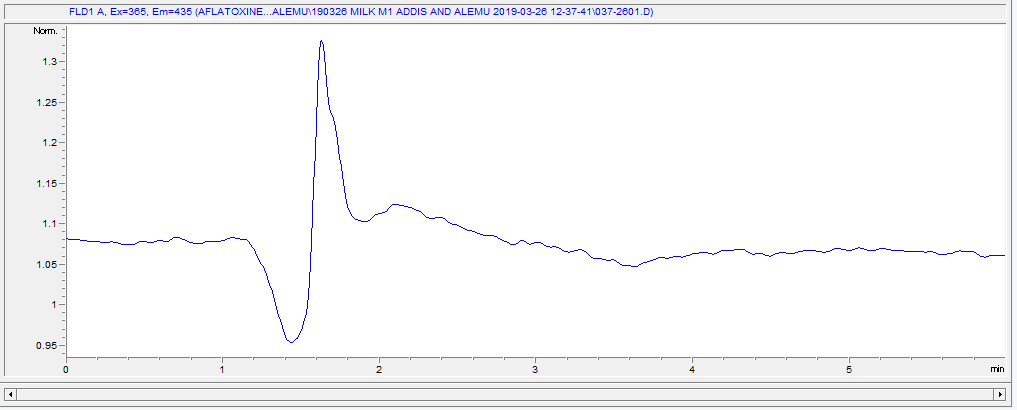


11185038 B


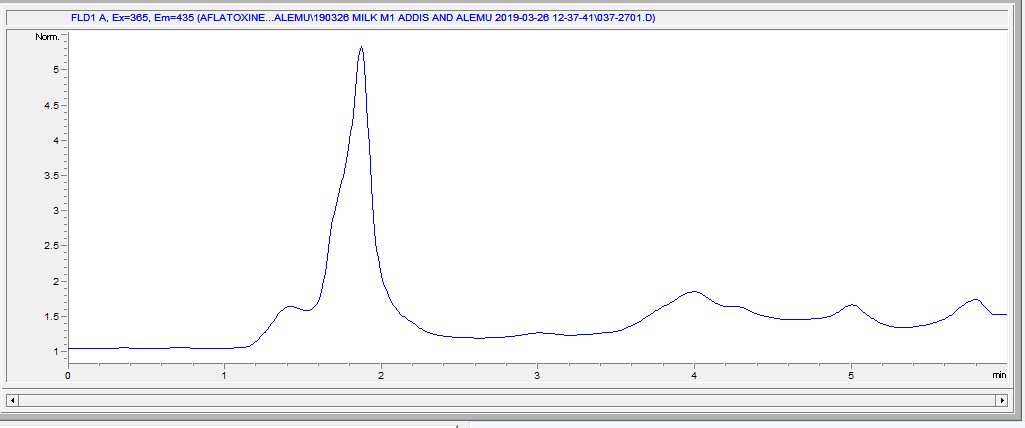


11185038 C


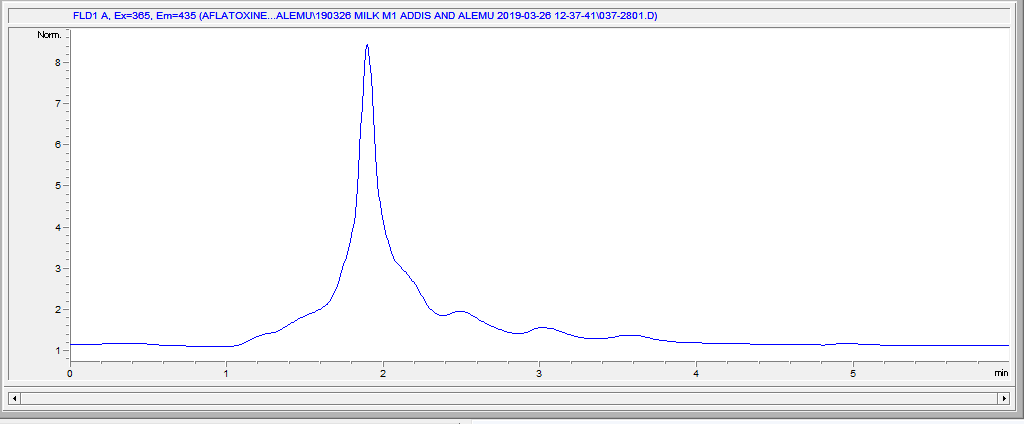


11185039 A


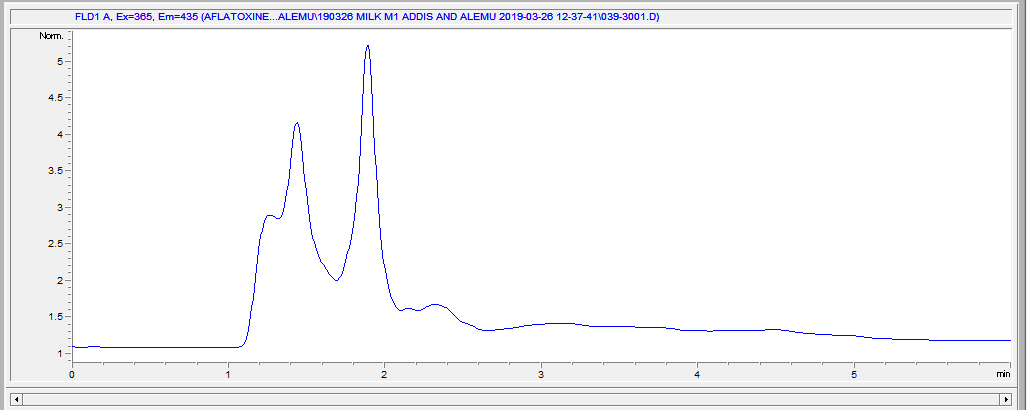


11185039 B


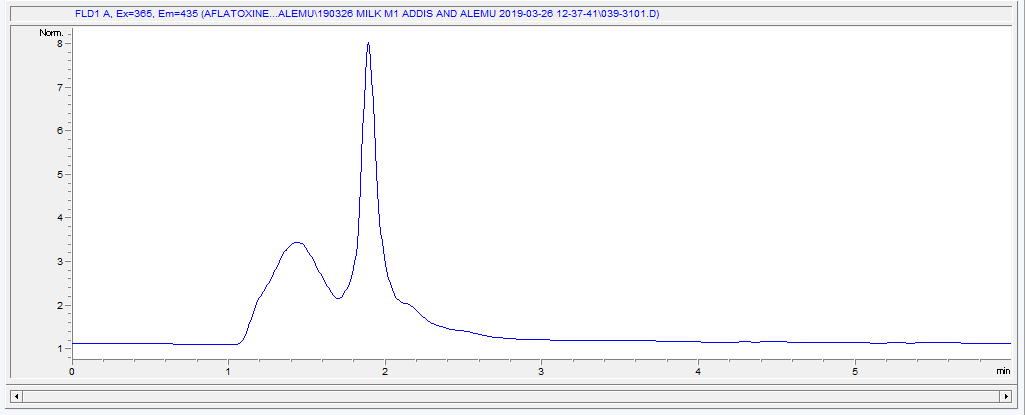


11185039 C


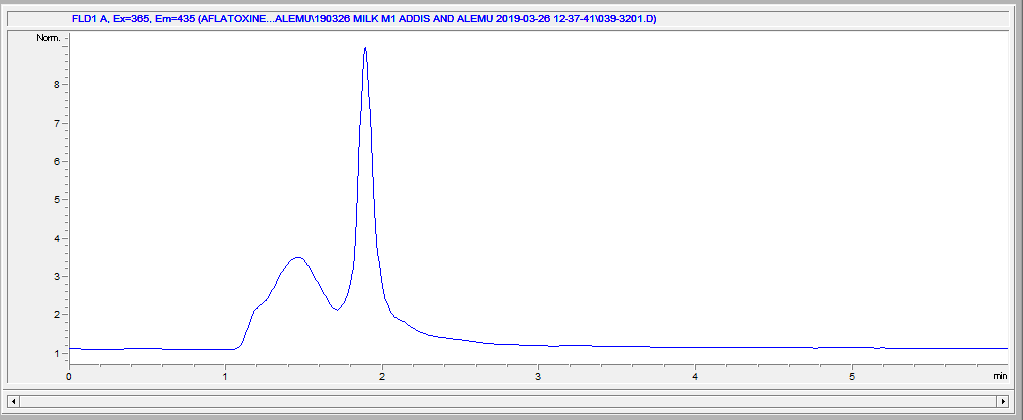


11185040 A


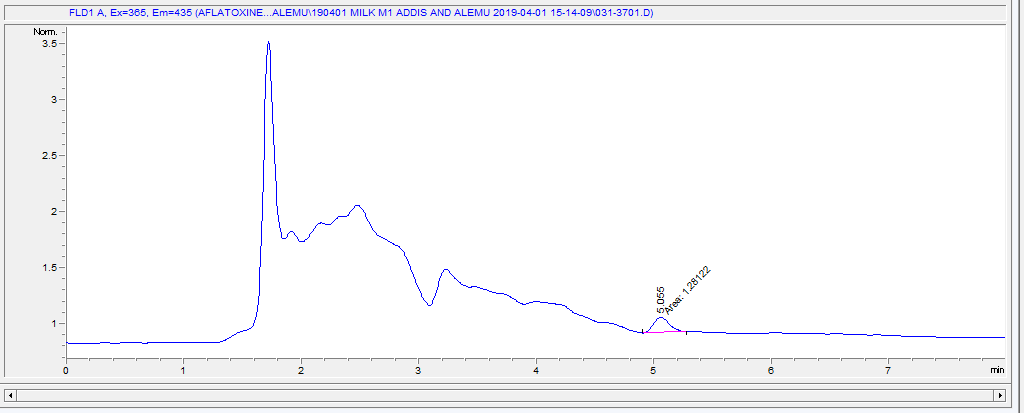


11185040 B


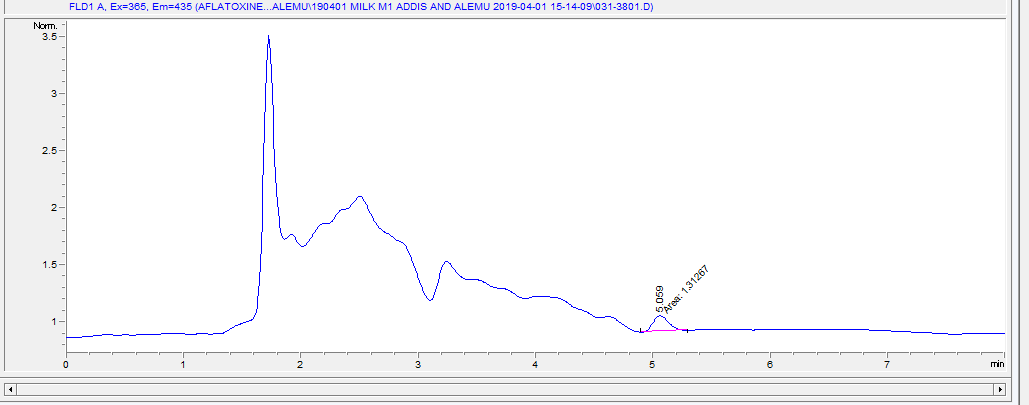


11185040 C


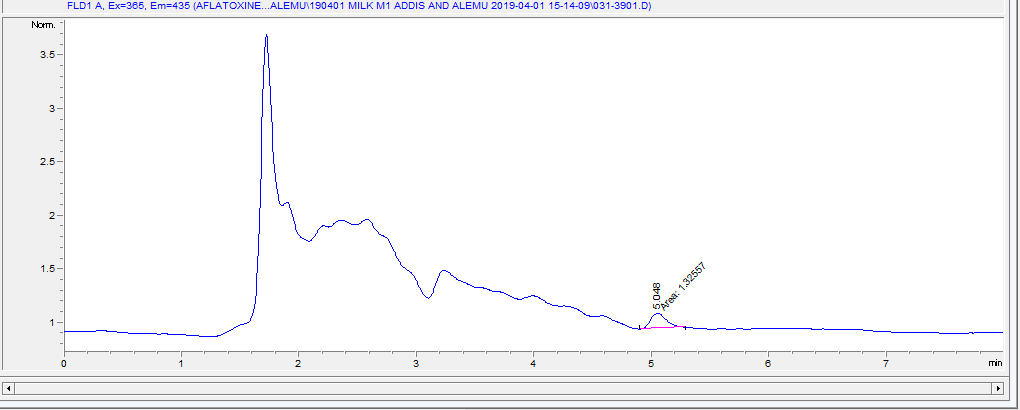


Spiked 11185025 A


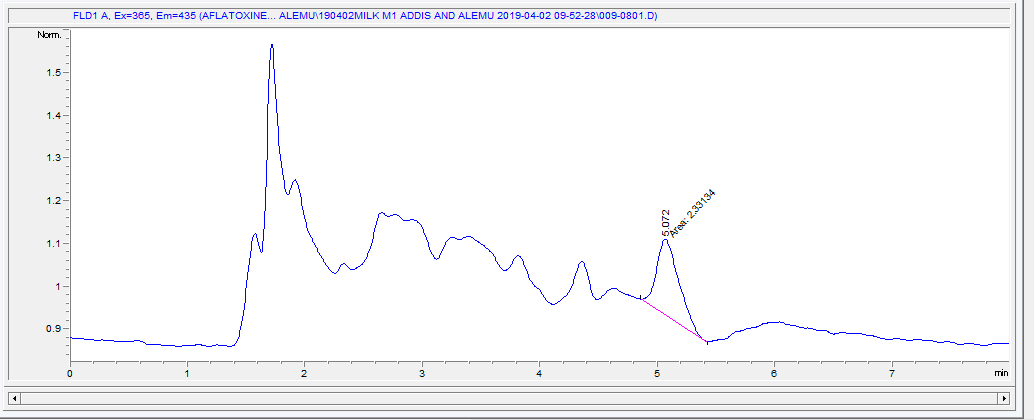


Spiked 11185025 B


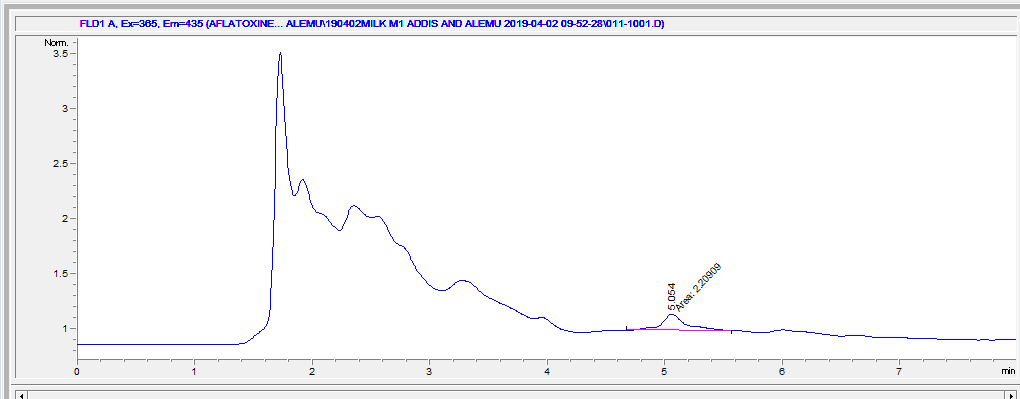


Spiked 11185025 C


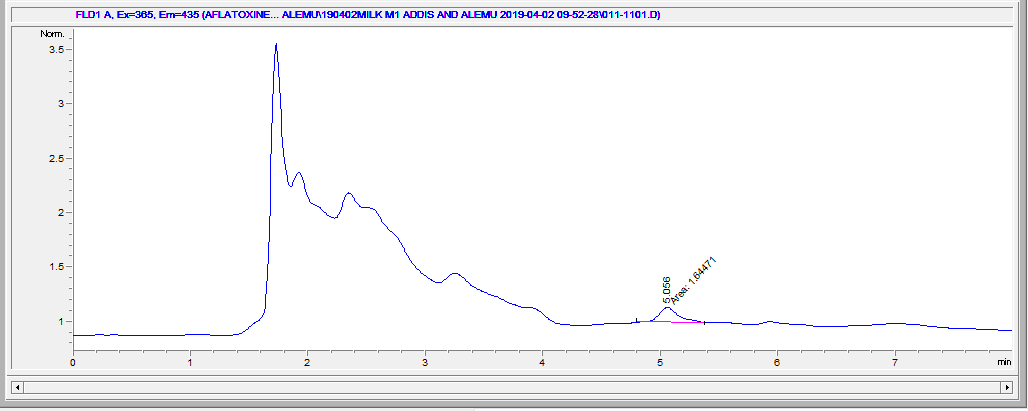


Spiked 11185028


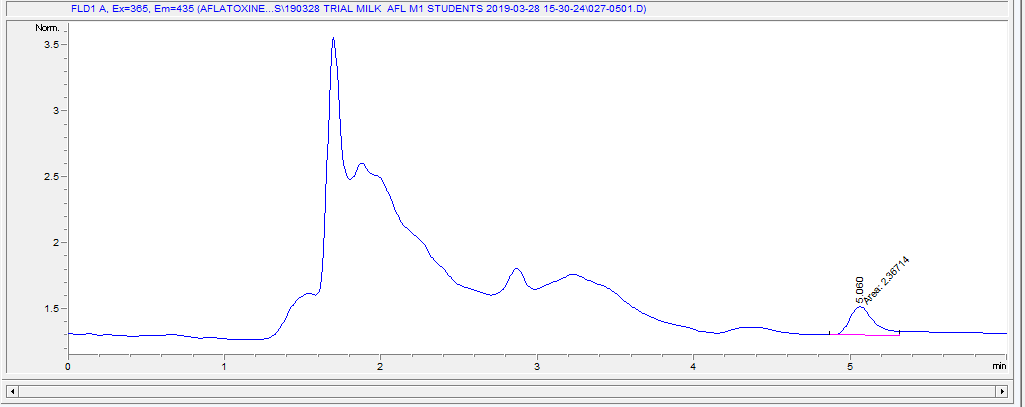


Chromatogram of standards and Blank

0.5ppb Aflatoxin M1


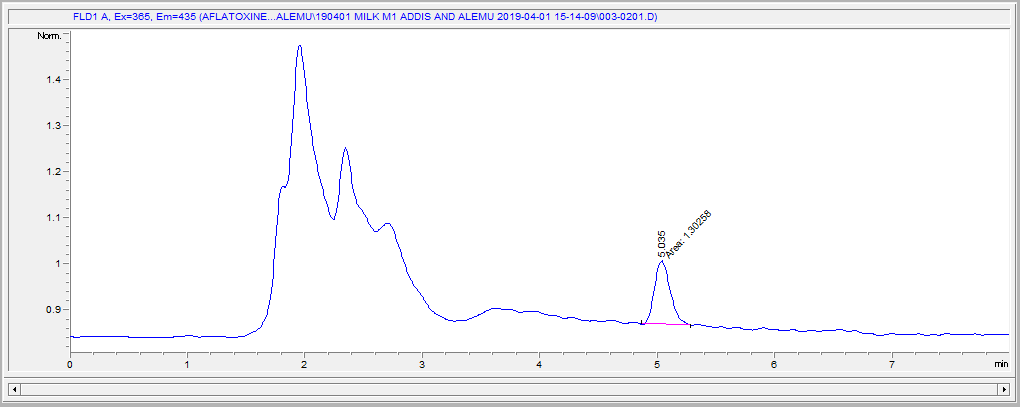


2ppb Aflatoxin M1


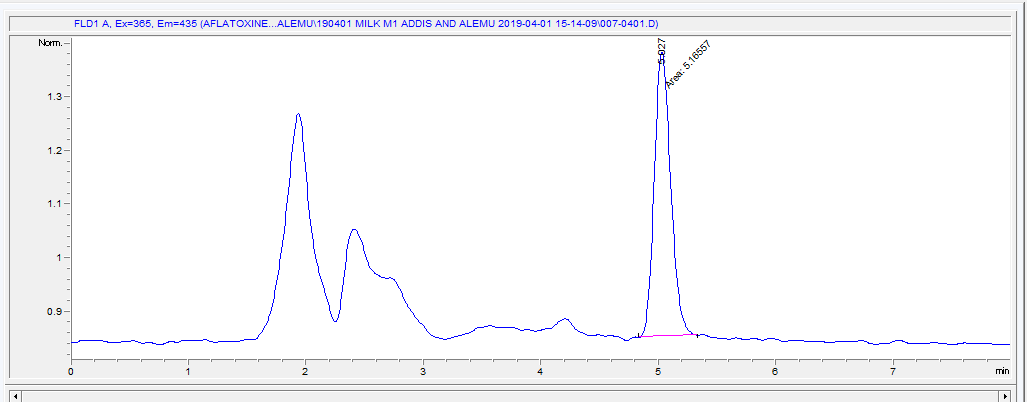


4ppb Aflatoxin M1


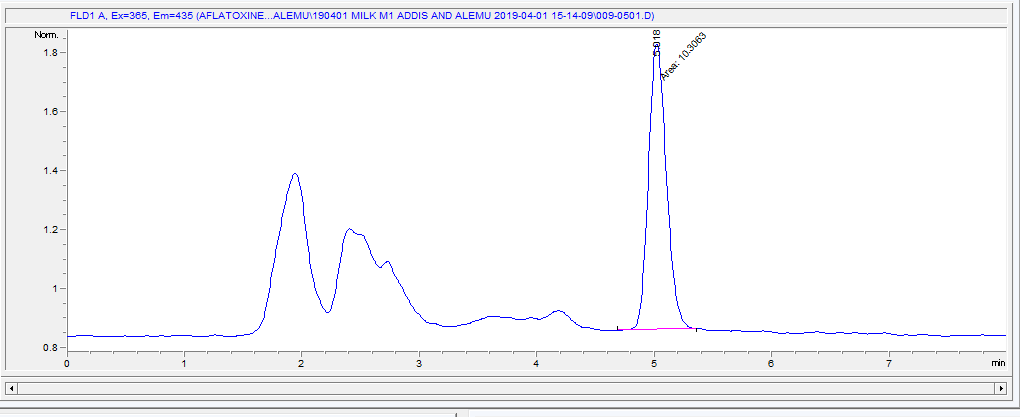


Blank


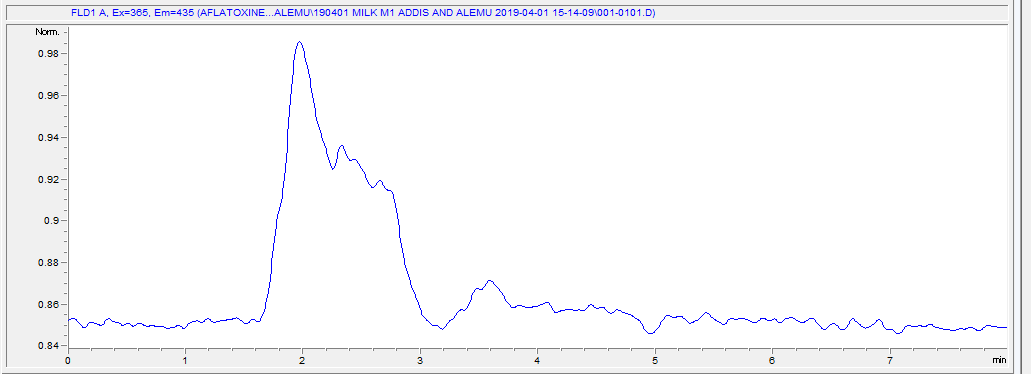

Supplement: Supplementary file 1 [file supplementary]
